# Supplementary figures and images for: Large-Scale Preparation of Uniform Millet Bread-like Durable Benzoxazine-Phthalonitrile Foam with Outstanding Mechanical and Thermal Properties
Source: MDPI journal article supplement (doi:10.3390/polym14245410), 2022-12-10

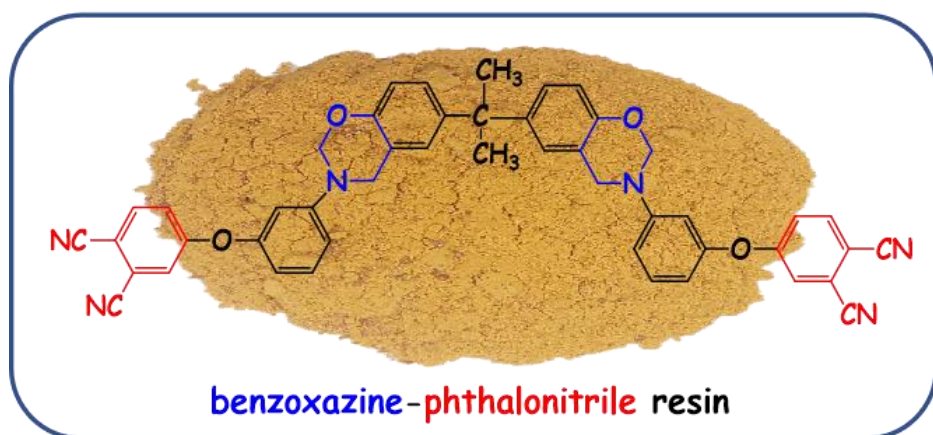

Figure S1 Chemical structure of the bi-functional benzoxazine-phthalonitrile resin

Supplement: s1 [file s1]
